# Supplementary figures and images for: Formation and properties of iodine- and acetonitrile-functionalized two-dimensional Si materials: a Density Functional Theory study
Source: Royal Society of Chemistry journal article supplement (doi:10.1039/d1cp03442a), 2021-12-07

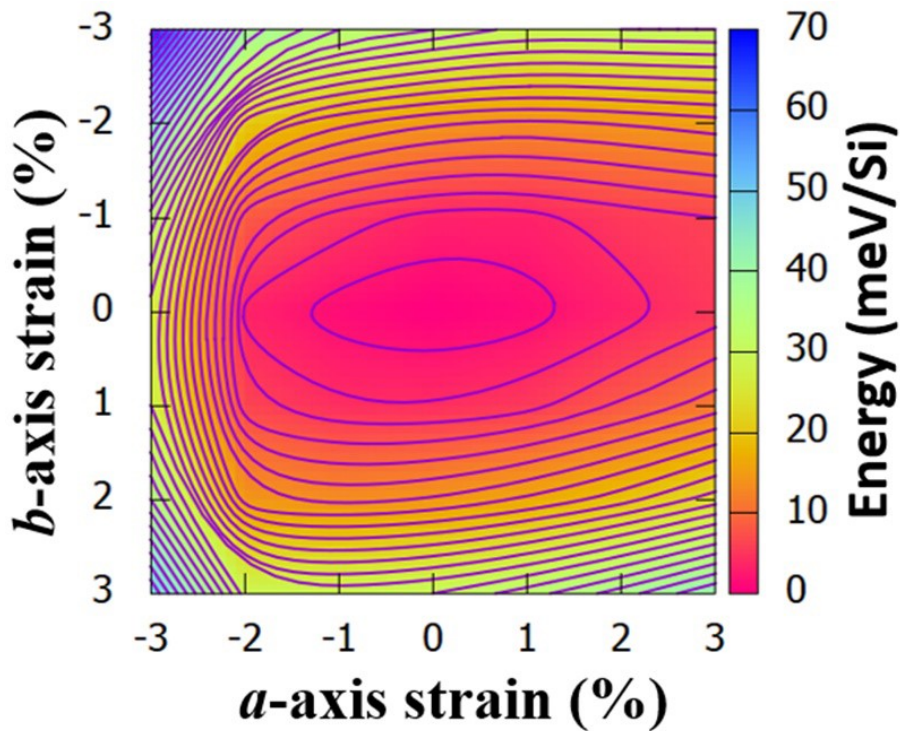

Supplement: d1cp03442a10.pdf [file d1cp03442a10.pdf]

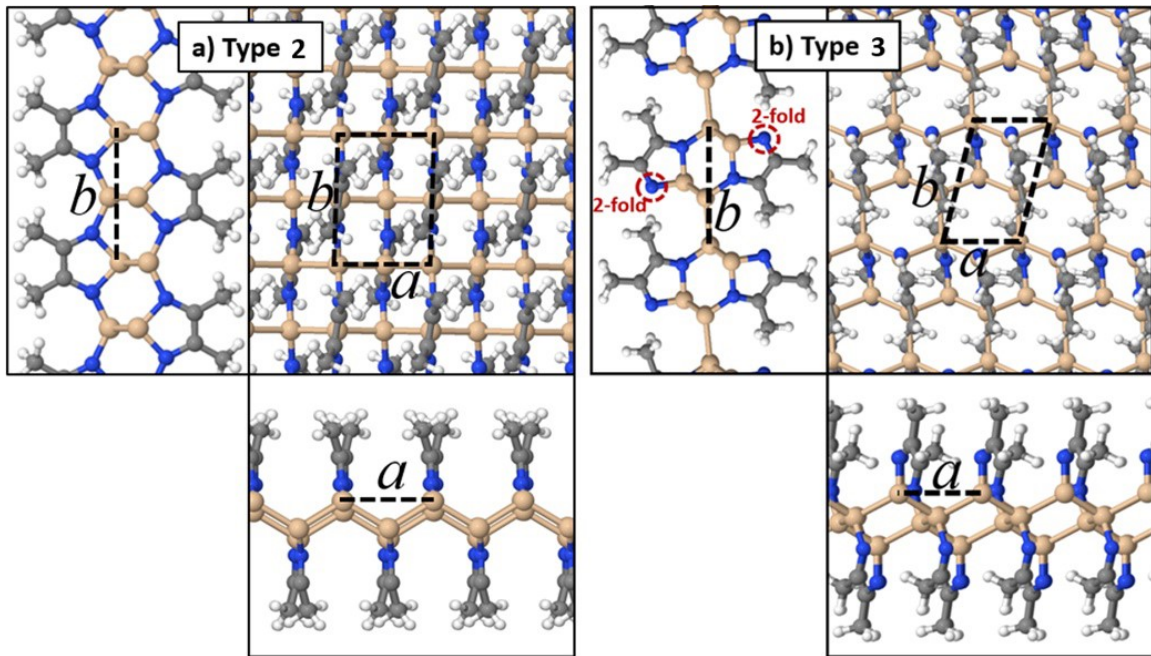

Supplement: d1cp03442a11.pdf [file d1cp03442a11.pdf]

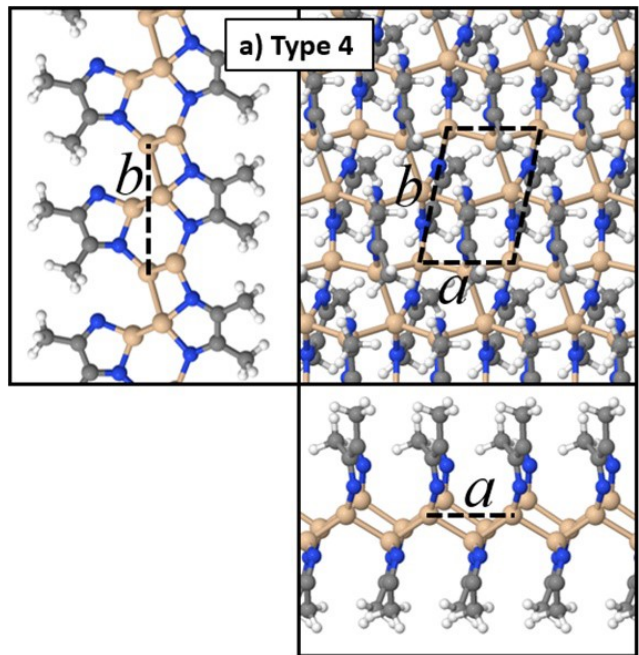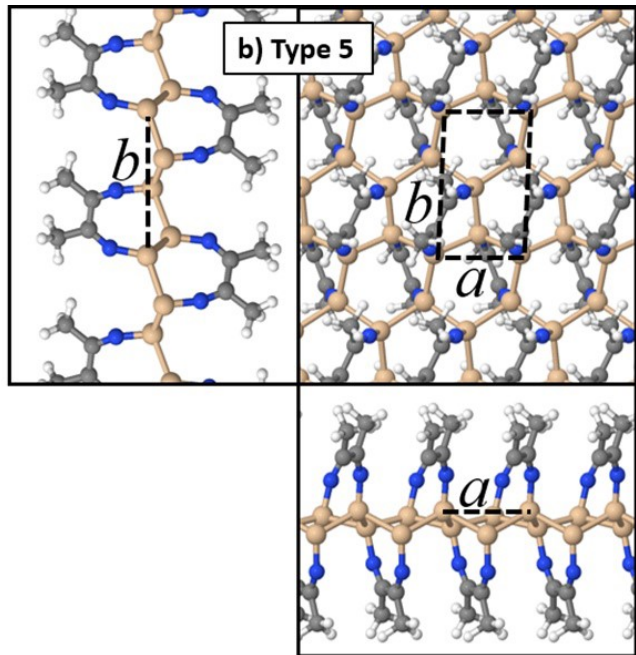

Supplement: d1cp03442a12.pdf [file d1cp03442a12.pdf]

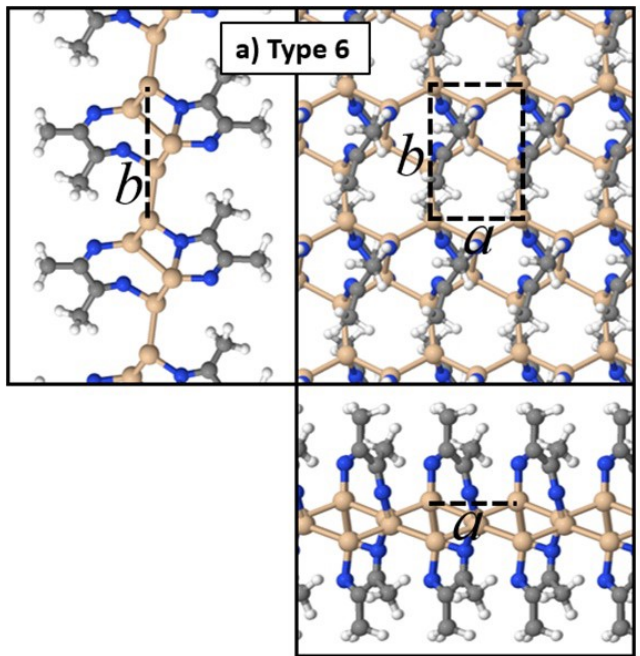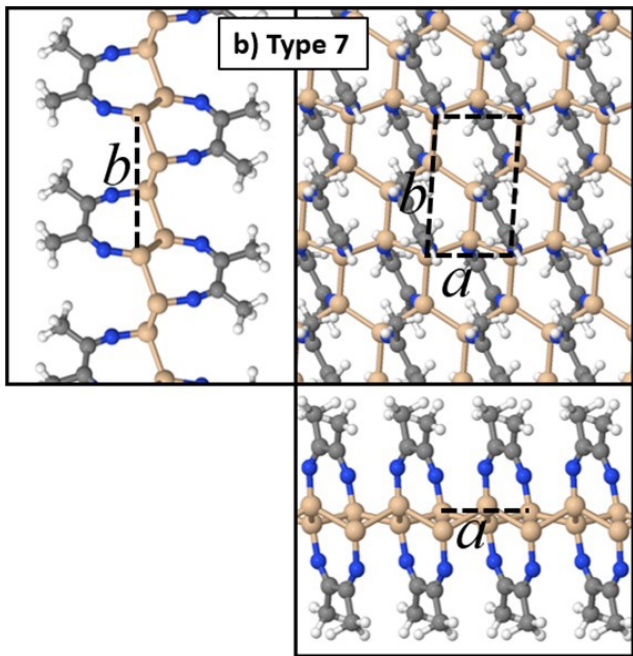

Supplement: d1cp03442a13.pdf [file d1cp03442a13.pdf]

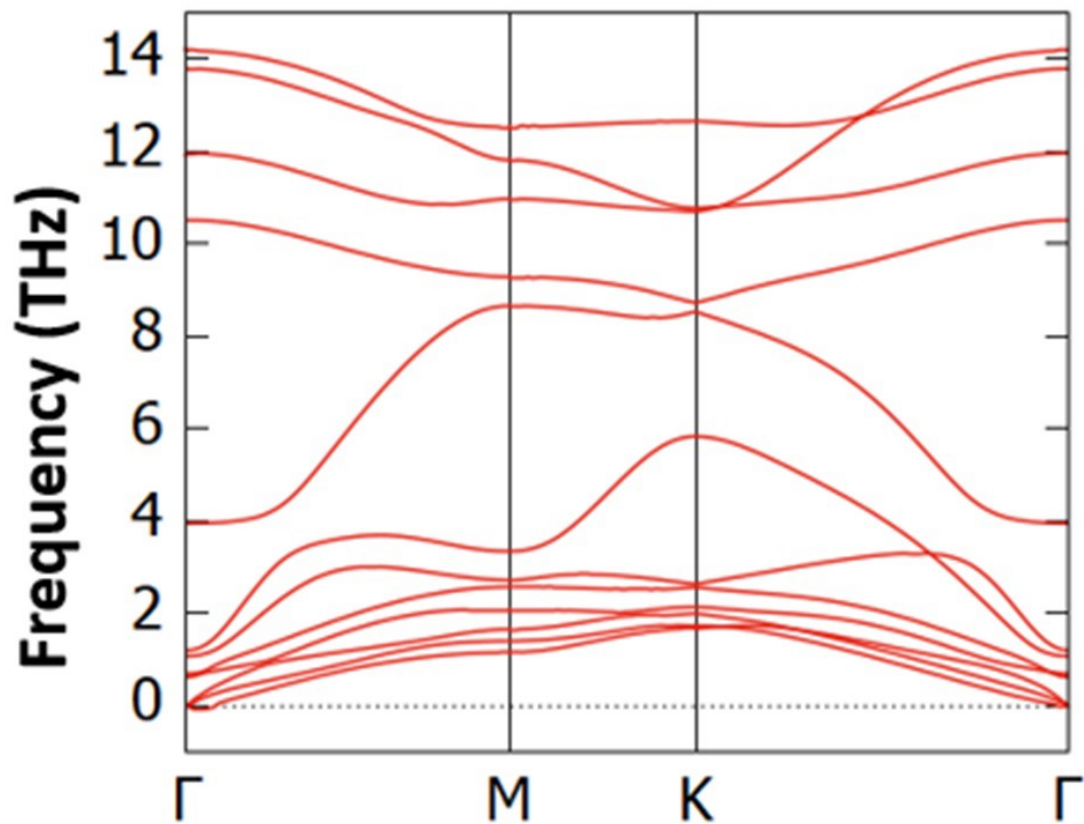

Supplement: d1cp03442a2.pdf [file d1cp03442a2.pdf]

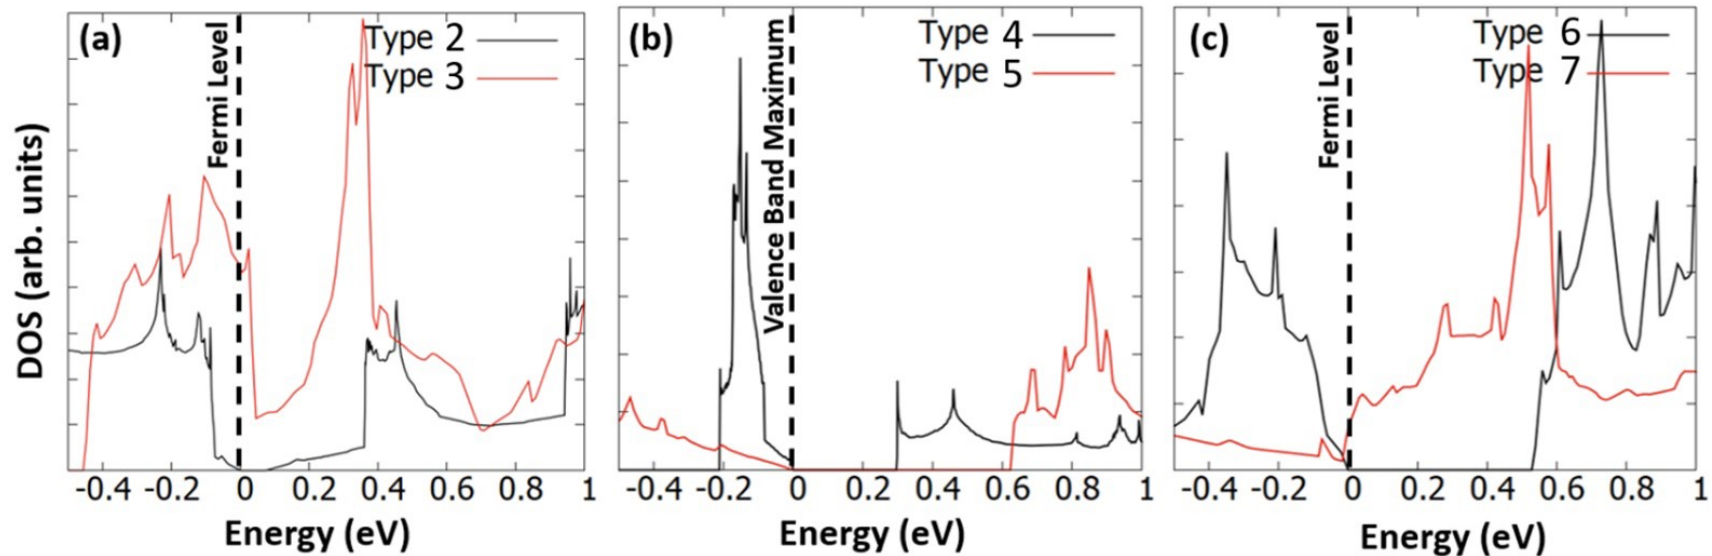

Supplement: d1cp03442a3.pdf [file d1cp03442a3.pdf]

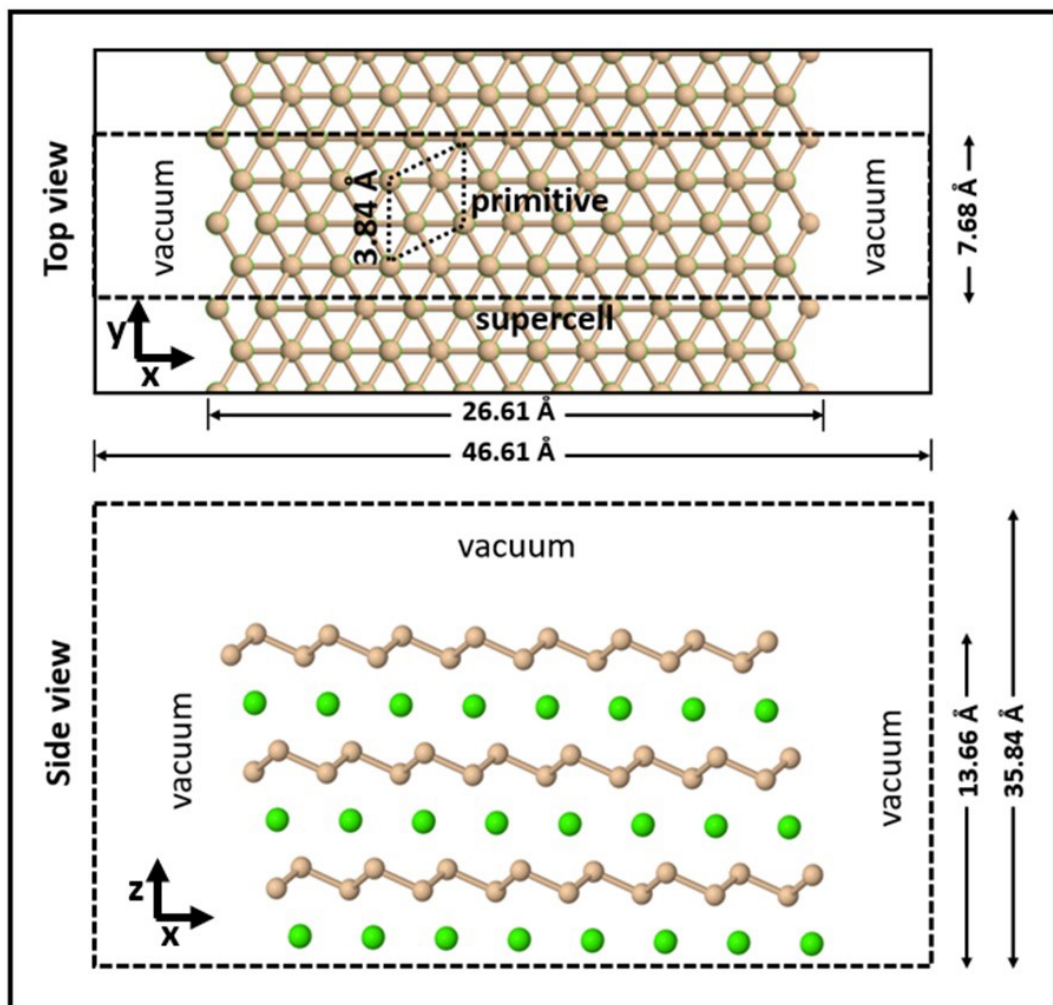

Supplement: d1cp03442a4.pdf [file d1cp03442a4.pdf]

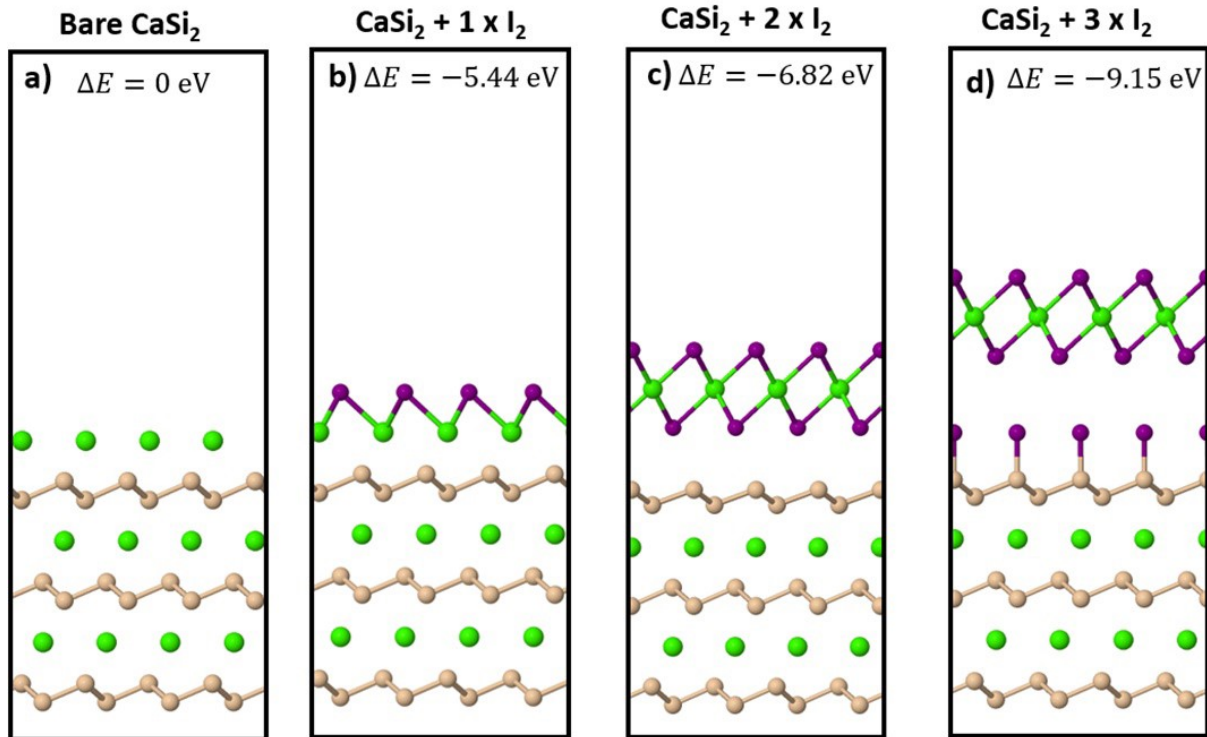

Supplement: d1cp03442a5.pdf [file d1cp03442a5.pdf]

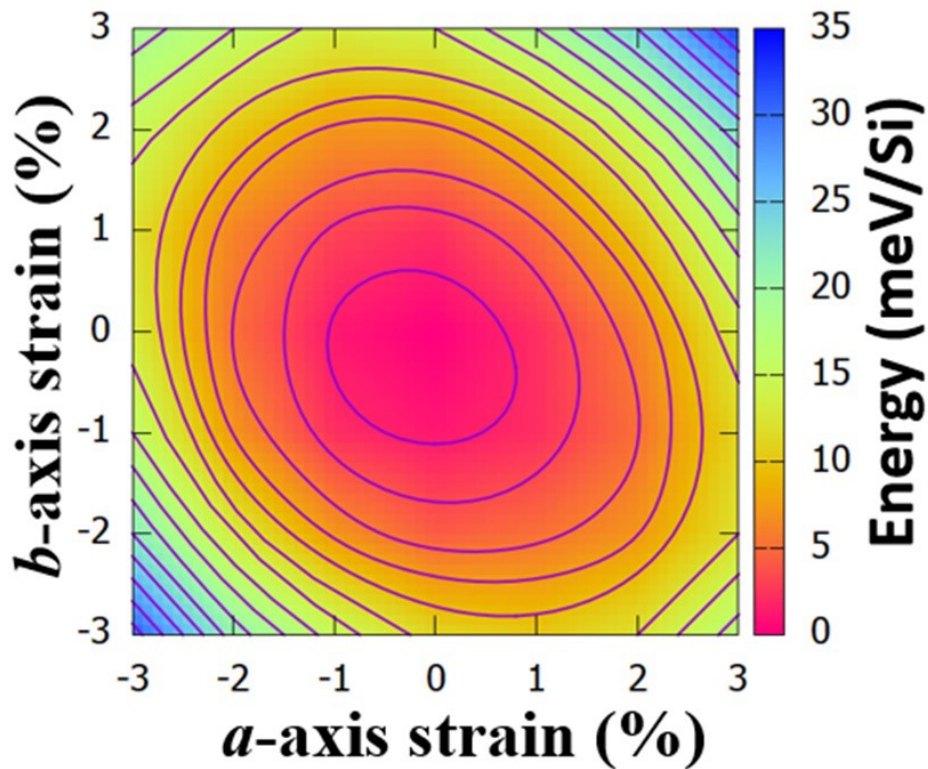

Supplement: d1cp03442a6.pdf [file d1cp03442a6.pdf]

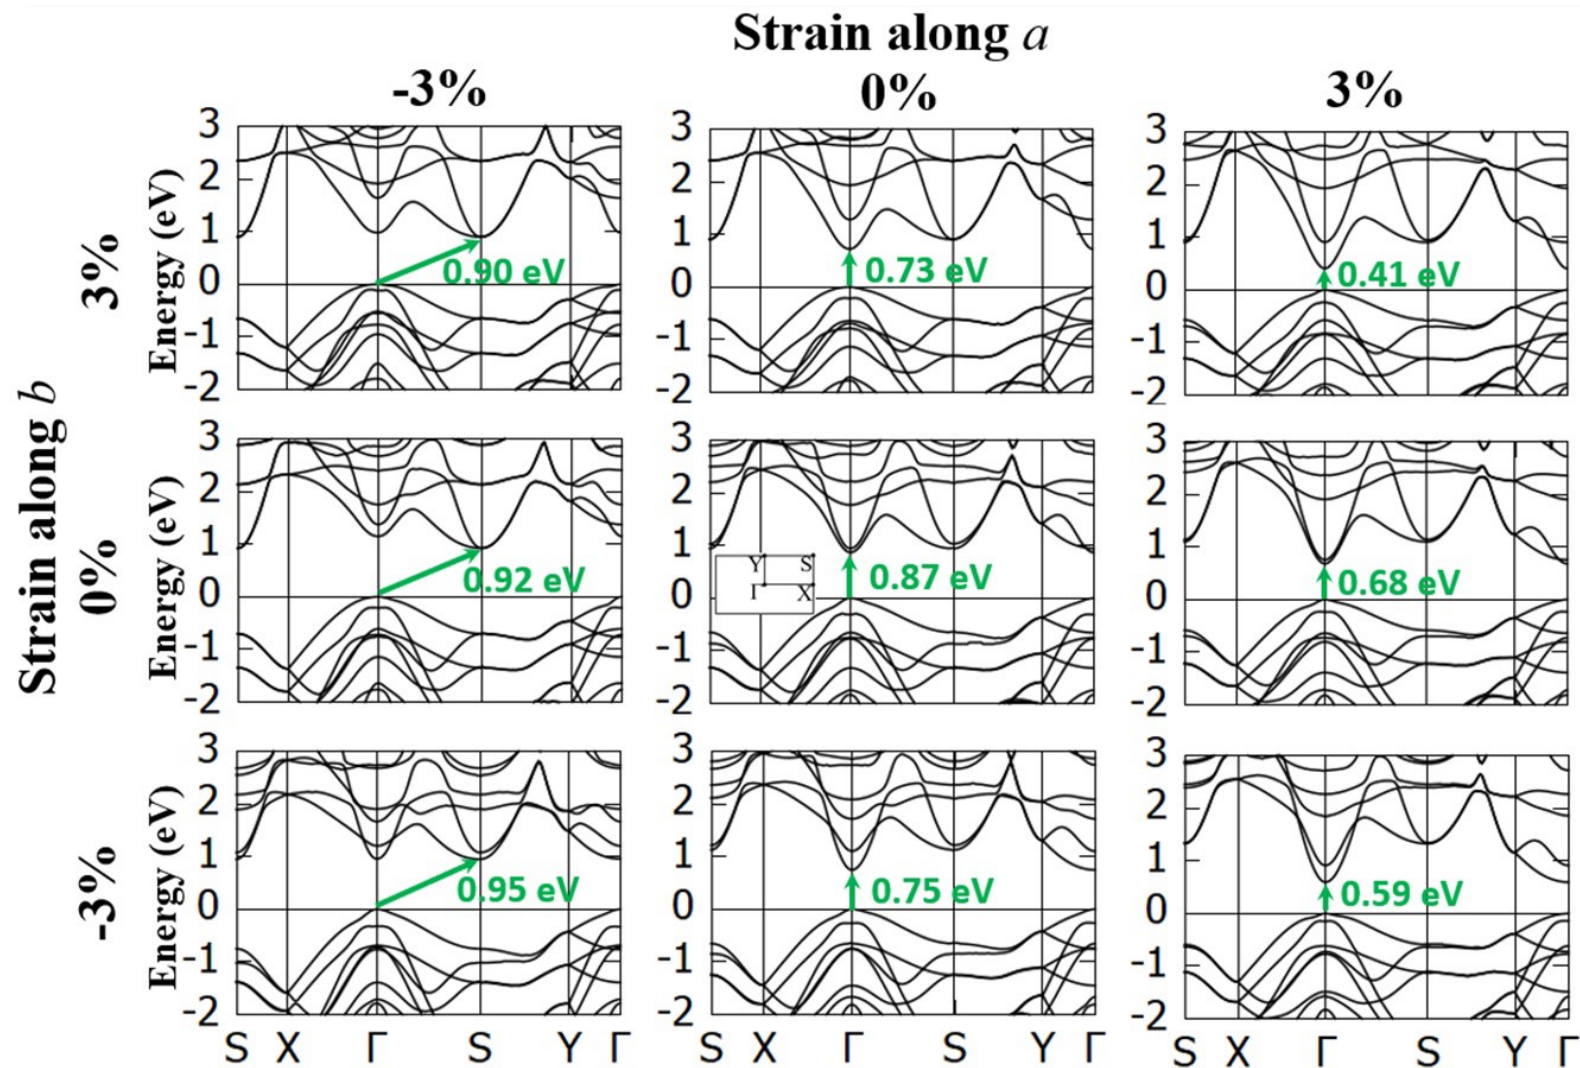

Supplement: d1cp03442a7.pdf [file d1cp03442a7.pdf]

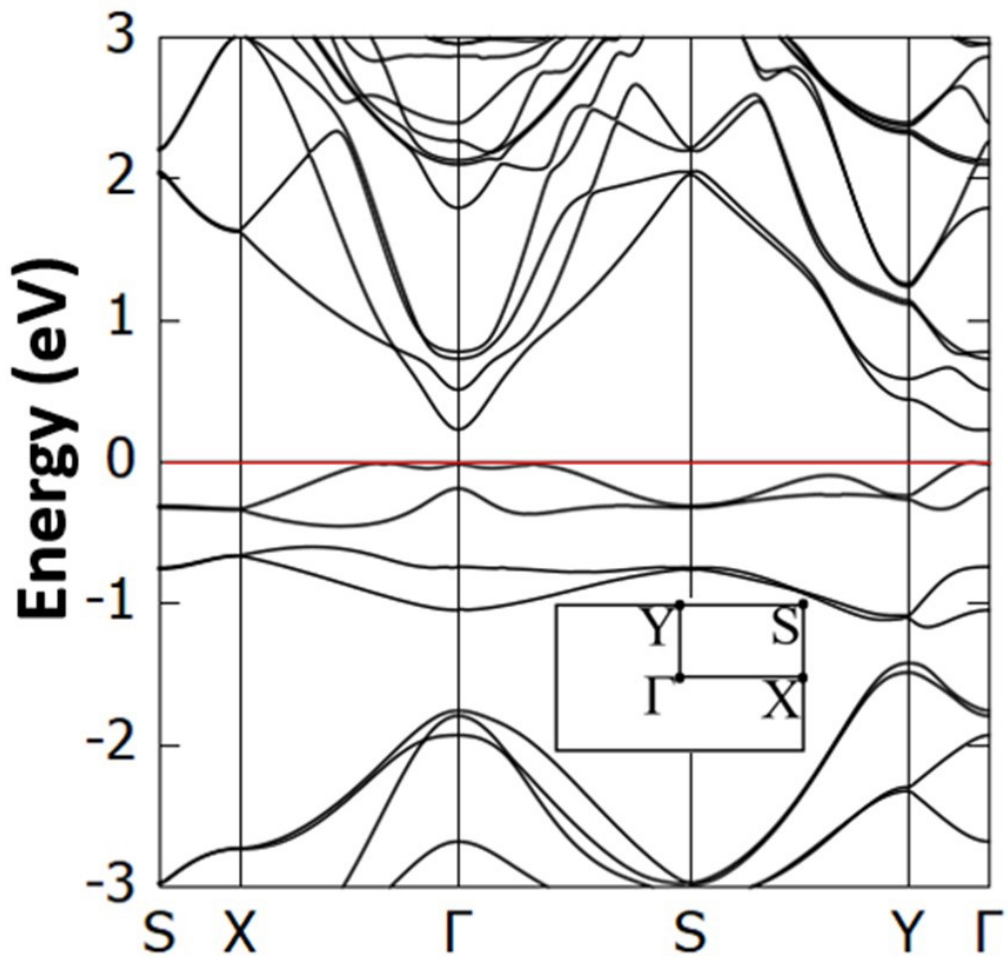

Supplement: d1cp03442a8.pdf [file d1cp03442a8.pdf]

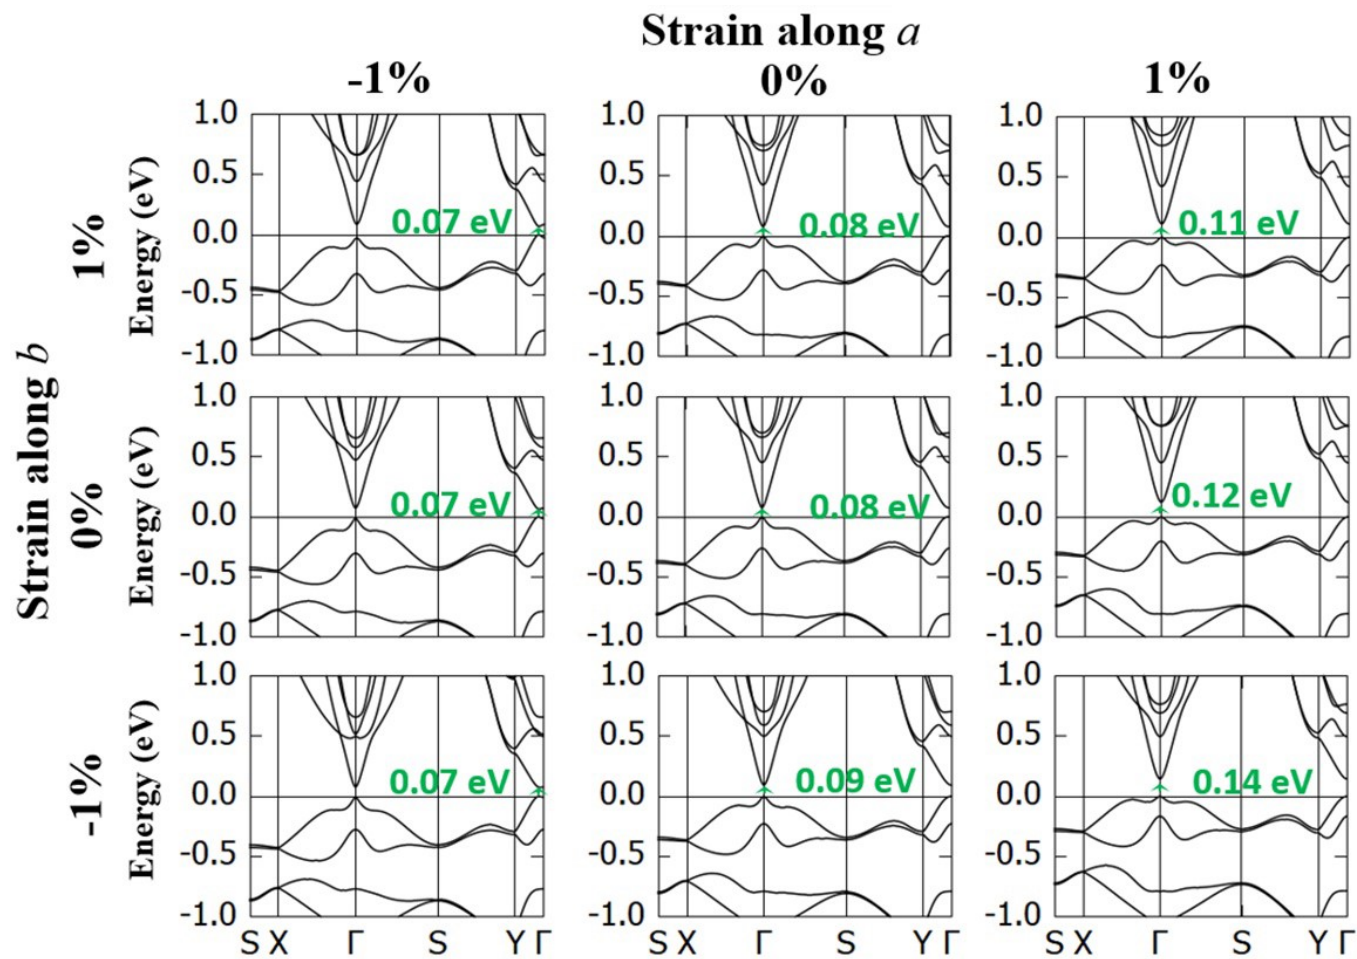

Supplement: d1cp03442a9.pdf [file d1cp03442a9.pdf]
